# Supplementary material
Source: PubMed Central journal article supplement (PMC5797849)
Supplement: NIHMS929473-supplement-supp_info_table_S1-S3.pdf [file NIHMS929473-supplement-supp_info_table_S1-S3.pdf]

**Supplemental Table 1 - Characteristics of individual studies in the International Head and Neck Cancer Epidemiology (INHANCE) consortium including information on dietary questionnaires.**

| Study Reference paper                                           | Recruitment period | Source (cases/controls)       | Participation rate, % (cases/controls) | Age eligibility (years) | Number of subjects (cases/controls) | Questionnaire, administration, reference period for the recall         | Frequency  | Serving size <sup>a</sup> | # Food items (including non-alcoholic beverages) | Condiments |
|-----------------------------------------------------------------|--------------------|-------------------------------|----------------------------------------|-------------------------|-------------------------------------|------------------------------------------------------------------------|------------|---------------------------|--------------------------------------------------|------------|
| <b>Italy Multicenter</b><br>Bosetti et al., 2003 <sup>b</sup>   | 1990-1999          | Hospital/Hospital - unhealthy | >95/>95                                | 18-80                   | 1261/2716                           | FFQ, interviewer-administered, 2 year before disease                   | Raw data   | S/M/L                     | 78 (including 6 non-alcoholic beverages)         | 12         |
| <b>Switzerland</b><br>Levi et al., 1998 <sup>b</sup>            | 1991-1997          | Hospital/Hospital - unhealthy | >95/>95                                | <80                     | 516/883                             | FFQ, interviewer-administered, 2 year before disease                   | Raw data   | S/M/L                     | 78 (including 6 non-alcoholic beverages)         | 12         |
| <b>Los Angeles, CA, USA</b> Cui et al., 2006                    | 1999-2004          | Cancer registry/Neighborhood  | 49/68                                  | 18-65                   | 417/1005                            | FFQ, interviewer-administered, during the past year                    | Raw data   | M                         | 78 (including 11 non-alcoholic beverages)        | 12         |
| <b>Boston, MA, USA</b> Peters et al., 2005                      | 1999-2004          | Hospital/Residential records  | 88.7/48.7                              | ≥18                     | 584/659                             | FFQ, self-administered, during the past year                           | Categories | M                         | 138 (including 12 non-alcoholic beverages)       | 18         |
| <b>New York, MSKCC, USA</b> Schantz et al., 1997                | 1992-1994          | Hospital/Blood donors         | NA                                     | NA                      | 134/169                             | FFQ-diet history, self-administered, during the past year <sup>c</sup> | Raw data   | S/M/L                     | 88 (including 5 non-alcoholic beverages)         | 6          |
| <b>Milan (2006-2009), Italy</b> Bravi et al., 2013 <sup>b</sup> | 2006-2009          | Hospital/Hospital - unhealthy | >95/>95                                | 18-80                   | 367/750                             | FFQ, interviewer-administered, 2 years before disease                  | Raw data   | S/M/L                     | 78 (including 6 non-alcoholic beverages)         | 12         |

| Study Reference paper                                                       | Recruitment period | Source (cases/controls)                                      | Participation rate, % (cases/controls) | Age eligibility (years) | Number of subjects (cases/controls) | Questionnaire, administration, reference period for the recall | Frequency  | Serving size <sup>a</sup> | # Food items (including non-alcoholic beverages)   | Condiments |
|-----------------------------------------------------------------------------|--------------------|--------------------------------------------------------------|----------------------------------------|-------------------------|-------------------------------------|----------------------------------------------------------------|------------|---------------------------|----------------------------------------------------|------------|
| <b>Buffalo, USA</b><br>Jayaprakash et al., 2006                             | 1982-1998          | Hospital/Hospital                                            | ~50/~50                                | NA                      | 632/1254                            | FFQ, self-administered, during the past few years              | Categories | M                         | 56 (including 12 non-alcoholic beverages)          | 4          |
| <b>North Carolina (2002-2006), USA</b><br>Divaris et al., 2010 <sup>c</sup> | 2002-2006          | Cancer registry/DMV files                                    | 82/61                                  | 20-80                   | 1368/1396                           | FFQ, interviewer-administered, during the past year            | Categories | M                         | 72 (including 5 non-alcoholic beverages) questions | 11         |
| <b>Japan (2001-2005)</b><br>Suzuki et al., 2006                             | 2001-2005          | Cancer hospital/Hospital-unhealthy                           | 97/97                                  | 20-79                   | 526/3102                            | FFQ, self-administered, during the past year                   | Categories | NA                        | 51 (including 3 non-alcoholic beverages)           | 3          |
| <b>US Multicenter</b><br>Blot et al., 1988                                  | 1983-1984          | Cancer registry/Random digit dialing and health care rosters | 75/76                                  | 18-79                   | 1114/1268                           | FFQ, interviewer-administered, during the past year            | Raw data   | S/M/L                     | 61 (including 13 non-alcoholic beverages)          | 9          |

ABBREVIATIONS: DMV: Department of Motor Vehicles; FFQ: food-frequency questionnaire; S: small; M: medium; MSKCC: Memorial Sloan Kettering Cancer Center; L: large; NA: not available.

<sup>a</sup>A quantification of the medium serving size was provided in all the studies, except for the Japan one. <sup>b</sup>Italy Multicenter, Milan (2006-2009) and Switzerland studies were based on the same food-frequency questionnaire. <sup>c</sup>The food-frequency questionnaire from the North Carolina study provided combined questions concerning consumption of specific food items and corresponding condiment habits or fat content of the food item of interest (i.e. while asking for cooked or raw vegetable consumption, the food frequency questionnaire asked for extra information on fat, sauce, or dressing added after cooking or at the table).

**Supplemental Table 2 – Descriptive statistics on raw values of fiber intake (g/day) across studies and in all the studies combined. International Head and Neck Cancer Epidemiology (INHANCE) consortium.**

| Study name                 | 20%   | Median | Mean  | 80%   |
|----------------------------|-------|--------|-------|-------|
| Boston                     | 12.27 | 18.29  | 19.65 | 26.67 |
| Buffalo                    | 16.20 | 24.48  | 26.67 | 35.38 |
| Italy Multicenter          | 16.85 | 22.39  | 23.23 | 29.06 |
| Japan (2001-2005)          | 7.90  | 9.93   | 10.42 | 12.79 |
| Los Angeles                | 5.60  | 8.80   | 9.58  | 12.81 |
| Milan (2006-2009)          | 16.02 | 21.27  | 22.18 | 27.45 |
| MSKCC                      | 8.70  | 12.55  | 14.14 | 18.38 |
| North Carolina (2002-2006) | 10.43 | 14.67  | 15.79 | 20.43 |
| Switzerland                | 11.23 | 16.84  | 17.85 | 23.76 |
| US Multicenter             | 7.79  | 11.52  | 12.48 | 16.56 |
| All studies combined       | 9.45  | 15.14  | 17.23 | 24.22 |

ABBREVIATIONS: MSKCC: Memorial Sloan Kettering Cancer Center.

**Supplemental Table 3 - Odds ratios (ORs)<sup>a</sup> of oral and pharyngeal cancer combined, and corresponding confidence intervals (95% CIs) on fiber intake quintile categories, according to anatomical subsite. International Head and Neck Cancer Epidemiology (INHANCE) consortium.**

|                           | Oral cavity          |                   |                  | Oropharynx/<br>Hypopharynx |                  | Oral cavity or pharynx<br>not otherwise specified |                  |
|---------------------------|----------------------|-------------------|------------------|----------------------------|------------------|---------------------------------------------------|------------------|
|                           | Controls<br>(n=8996) | Cases<br>(n=1234) | OR (95% CI)      | Cases<br>(n=2024)          | OR (95% CI)      | Cases<br>(n=636)                                  | OR (95% CI)      |
| I Quintile <sup>b</sup>   | 1430                 | 331               | 1 (reference)    | 560                        | 1 (reference)    | 171                                               | 1 (reference)    |
| II Quintile <sup>b</sup>  | 1751                 | 267               | 0.70 (0.58-0.85) | 380                        | 0.67 (0.55-0.81) | 146                                               | 0.76 (0.59-0.98) |
| III Quintile <sup>b</sup> | 1889                 | 230               | 0.61 (0.50-0.74) | 379                        | 0.65 (0.55-0.77) | 112                                               | 0.62 (0.48-0.82) |
| IV Quintile <sup>b</sup>  | 1986                 | 216               | 0.51 (0.42-0.63) | 354                        | 0.57 (0.47-0.71) | 107                                               | 0.45 (0.30-0.66) |
| V Quintile <sup>b</sup>   | 1940                 | 190               | 0.39 (0.29-0.52) | 351                        | 0.54 (0.45-0.64) | 100                                               | 0.46 (0.33-0.65) |
| <i>p</i> for linear trend |                      |                   | <0.001           |                            | <0.001           |                                                   | <0.001           |

<sup>a</sup>Estimated from separate random-effects logistic regression models adjusted for age, sex, race, study center, education, cigarette smoking status, cigarette smoking intensity (number of cigarettes per day), cigarette smoking duration, cigar smoking status, pipe smoking status, alcohol drinking intensity (number of drinks per day), and the product (interaction) term for cigarette intensity and alcohol drinking, in the presence of heterogeneity between studies (*p*-values equal to 0.084, 0.005, and 0.036 for the oral cavity, oropharynx/hypopharynx, and 'oral cavity or pharynx not otherwise specified' subsites, respectively); <sup>b</sup>The cut-offs for the quintile categories of fiber intake were: -0.786, -0.322, 0.129, and 0.729, respectively.
